# Supplementary material
Source: PubMed Central journal article supplement (PMC5586582)
Supplement: CJN.11801116SupplementaryData.pdf [file CJN.11801116SupplementaryData.pdf]

### Appendix 1. List of participating centers across The Netherlands

Albert Schweitzer Hospital, Dordrecht; Amsterdam University Hospital, Amsterdam; Bernhoven Hospital, Uden, Diakonessenhuis, Utrecht; Groene Hart Hospital, Gouda; Jeroen Bosch Hospital, 's Hertogenbosch; Spaarne Gasthuis, Hoofddorp, Haarlem; Maasstad Hospital, Rotterdam, St Antonius Hospital, Nieuwegein; St Elisabeth Hospital, Tilburg; Franciscus Gasthuis & Vlietland hospital, Rotterdam, Schiedam; Ter Gooi Hospital, Hilversum; University Medical Center Utrecht, Utrecht; Zaan Medical Center, Zaandam; Gelderse Vallei Hospital, Ede.

### Appendix 2. Frailty screening measurements as used in the study

| <b>Fried Frailty Index</b> |                                |                                                                                                            |       |
|----------------------------|--------------------------------|------------------------------------------------------------------------------------------------------------|-------|
| Components                 | Measurements                   | Description/cut-off                                                                                        | Score |
| Malnutrition               | Unintentional weight loss      | 4,5 kg or $\geq$ 5%                                                                                        | Yes=1 |
| Physical performance       | Slowness                       | $\geq$ 6 seconds/4 meters                                                                                  | Yes=1 |
|                            | Low level of physical activity | Last 3 months $\geq$ 4 hours sedative lifestyle, no activities like cycling or running                     | Yes=1 |
|                            | Grip strength (kg)             | Male:<br>< 70 year: < 28.2; $\geq$ 70 year: < 21.3<br>Female:<br>< 70 year: < 15.4; $\geq$ 70 year: < 14.7 | Yes=1 |
| General health             | Exhaustion                     | Exhaustion (self-report)                                                                                   | Yes=1 |
| Frailty: $\geq$ 3 points   |                                |                                                                                                            |       |

| <b>Groningen Frailty Indicator</b> |                                                                                                                                                                                                                                                                                                                                                     |                                    |
|------------------------------------|-----------------------------------------------------------------------------------------------------------------------------------------------------------------------------------------------------------------------------------------------------------------------------------------------------------------------------------------------------|------------------------------------|
| Components                         | Description/cut-off                                                                                                                                                                                                                                                                                                                                 | Score                              |
| Physical performance               | <i>Are you able to carry out these tasks single-handedly and without any help?</i> (The use of help resources, such as a walking stick, walking frame, or wheelchair, is considered to be independent.)<br>1. Shopping<br>2. Walking around outside (around the house or to the neighbours)<br>3. Dressing and undressing<br>4. Going to the toilet | Yes = 0, No = 1                    |
| General health                     | 5. <i>What mark do you give yourself for physical fitness?</i> (scale 0 to 10)                                                                                                                                                                                                                                                                      | 0-6 = 1, 7-10 = 0                  |
| Neurosensory deficits              | 6. <i>Do you experience problems in daily life because of poor vision?</i><br>7. <i>Do you experience problems in daily life because of being hard of hearing?</i>                                                                                                                                                                                  | Yes = 1, No = 0                    |
| Malnutrition                       | 8. <i>During the past 6 months have you lost a lot of weight unwillingly?</i> (3 kg in 1 month or 6 kg in 2 months)                                                                                                                                                                                                                                 | Yes = 1, No = 0                    |
| Polypharmacy                       | 9. <i>Do you take 4 or more different types of medicine?</i>                                                                                                                                                                                                                                                                                        | Yes = 1, No = 0                    |
| Cognition                          | 10. <i>Do you have any complaints about your memory?</i>                                                                                                                                                                                                                                                                                            | No = 0<br>Sometimes = 0<br>Yes = 1 |
| Mood, psychosocial                 | 11. <i>Do you sometimes experience emptiness around you?</i>                                                                                                                                                                                                                                                                                        | No = 0                             |
|                                    | 12. <i>Do you sometimes miss people around you?</i>                                                                                                                                                                                                                                                                                                 | Sometimes = 1                      |
|                                    | 13. <i>Do you sometimes feel abandoned?</i>                                                                                                                                                                                                                                                                                                         | Yes = 1                            |
|                                    | 14. <i>In the past 4 weeks did you feel downhearted or sad?</i><br>15. <i>In the past 4 weeks did you feel nervous or anxious?</i>                                                                                                                                                                                                                  |                                    |
| Frailty: $\geq$ 4 points           |                                                                                                                                                                                                                                                                                                                                                     |                                    |

Supplemental material is neither peer-reviewed nor thoroughly edited by CJASN. The authors alone are responsible for the accuracy and presentation of the material.

| <b>VMS Vulnerable elderly</b>       |                                                                                                                                                                                                                                                                      |                                                                  |
|-------------------------------------|----------------------------------------------------------------------------------------------------------------------------------------------------------------------------------------------------------------------------------------------------------------------|------------------------------------------------------------------|
| Components                          | Description/cut-off                                                                                                                                                                                                                                                  | Score                                                            |
| Delirium*                           | 1. Do you have memory problems?<br>2. In the last 24 hours did you need help with daily self-care?<br>3. During previous hospitalization or illness were there periods that you were confused?                                                                       | Yes = 1<br>Impairment domain: $\geq 1$                           |
| Falls                               | 4. In the last 6 months did you fall?                                                                                                                                                                                                                                | Yes = 1<br>Impairment: $\geq 1$                                  |
| Physical impairment                 | Do you need help with:<br>5. Bathing<br>6. Dressing<br>7. Toileting<br>8. Transferring from/to chair<br>9. Feeding<br>10. Do you use incontinence material?                                                                                                          | Yes = 1<br>Impairment: $\geq 2$                                  |
| Malnutrition                        | 11. Have you lost weight unintentionally?<br>More than 3 kg in the last month<br>More than 6 kg in the last 6 months<br>12. Did you experience a decreased appetite over the last month?<br>13. Did you use supplemental drinks or tube feeding over the last month? | Yes = 2<br>Yes = 3<br>Yes = 1<br>Yes = 1<br>Impairment: $\geq 2$ |
| Frailty: Impairment $\geq 1$ domain |                                                                                                                                                                                                                                                                      |                                                                  |

\* Caregivers were asked to fill in a form with additional questionnaires on cognition and behaviour of the patient (neuropsychiatric inventory NPI). Impairment in the NPI which was used to calculate the delirium score of the VMS score.

| <b>ISAR-HP</b>           |                                                                                                                                                                                              |                |
|--------------------------|----------------------------------------------------------------------------------------------------------------------------------------------------------------------------------------------|----------------|
| Components               | Description/cut-off                                                                                                                                                                          | Score          |
| IADL                     | Before hospital admission, did you need assistance for IADL (e.g., assistance in housekeeping, preparing meals, shopping, etc.) on a regular basis?<br>Do you need assistance for traveling? | Yes=1<br>Yes=1 |
| Mobility                 | Do you use a walking device (e.g., a cane, walking frame, crutches, etc.)?                                                                                                                   | Yes=2          |
| Other                    | Did you pursue education after age 14?                                                                                                                                                       | Yes=1          |
| Frailty: $\geq 2$ points |                                                                                                                                                                                              |                |

Supplemental material is neither peer-reviewed nor thoroughly edited by CJASN. The authors alone are responsible for the accuracy and presentation of the material.

| <b>G8</b>                     |                                                                                                                                   |                                                                                                              |
|-------------------------------|-----------------------------------------------------------------------------------------------------------------------------------|--------------------------------------------------------------------------------------------------------------|
| Components                    | Description/cut-off                                                                                                               | Score                                                                                                        |
| Malnutrition                  | Has food intake declined over the past 3 months due to loss of appetite, digestive problems, chewing, or swallowing difficulties? | 0 = Severe decrease in food intake<br>1 = Moderate decrease in food intake<br>2 = No decrease in food intake |
|                               | Weight loss during the last 3 months?                                                                                             | 0 = Weight loss >3 kg<br>1 = Does not know<br>2 = Weight loss between 1 and 3 kg<br>3 = No weight loss       |
|                               | Body mass index (BMI)? (weight in kilograms) / (height in square metres)                                                          | 0 = BMI <19<br>1 = BMI 19 to <21<br>2 = BMI 21 to <23<br>3 = BMI ≥23                                         |
| Mobility                      | Mobility?                                                                                                                         | 0 = Bed or chair bound<br>1 = Able to get out of bed/chair but does not go out<br>2 = Goes out               |
| Cognition/mood                | Neuropsychological problems?                                                                                                      | 0 = Severe dementia or depression<br>1 = Mild dementia<br>2 = No psychological problems                      |
| Polypharmacy                  | Takes more than three prescription drugs per day?                                                                                 | 0 = Yes<br>1 = No                                                                                            |
| General health                | In comparison with other people of the same age, how does the patient consider his/her health status?                             | 0.0 = Not as good<br>0.5 = Does not know<br>1.0 = As good<br>2.0 = Better                                    |
| Age                           | Age                                                                                                                               | 0 = >85<br>1 = 80–85<br>2 = <80                                                                              |
| Total score 17, Frailty: ≤ 14 |                                                                                                                                   |                                                                                                              |

Supplemental material is neither peer-reviewed nor thoroughly edited by CJASN. The authors alone are responsible for the accuracy and presentation of the material.

**Appendix 3. 2x2 table frailty screening modality and GA**

| Frailty screening modality  |              | GA score (n) |    |              | Total |
|-----------------------------|--------------|--------------|----|--------------|-------|
| Test                        | Score        | -            | +  | <i>total</i> |       |
| Fried Frailty Index         | -            | 23           | 33 | 56           | 108   |
|                             | +            | 6            | 46 | 52           |       |
|                             | <i>total</i> | 29           | 79 |              |       |
| Groningen Frailty Indicator | -            | 18           | 22 | 40           | 123   |
|                             | +            | 16           | 67 | 83           |       |
|                             | <i>total</i> | 34           | 89 |              |       |
| G8                          | -            | 8            | 7  | 15           | 123   |
|                             | +            | 26           | 82 | 108          |       |
|                             | <i>total</i> | 34           | 89 |              |       |
| ISAR-HP                     | -            | 24           | 22 | 46           | 114   |
|                             | +            | 6            | 62 | 68           |       |
|                             | <i>total</i> | 30           | 84 |              |       |
| VMS-vulnerable elderly      | -            | 9            | 6  | 15           | 83    |
|                             | +            | 16           | 52 | 68           |       |
|                             | <i>total</i> | 25           | 58 |              |       |
| Frailty Question            | -            | 17           | 21 | 38           | 103   |
|                             | +            | 10           | 55 | 65           |       |
|                             | <i>total</i> | 27           | 76 |              |       |

Supplemental material is neither peer-reviewed nor thoroughly edited by CJASN. The authors alone are responsible for the accuracy and presentation of the material.

#### Appendix 4. Discriminating abilities

| Table 1. Prevalence and discriminating test characteristics frailty measurements– GA minimum of 3 impairments                                                    |               |                       |              |              |              |              |                   |                  |
|------------------------------------------------------------------------------------------------------------------------------------------------------------------|---------------|-----------------------|--------------|--------------|--------------|--------------|-------------------|------------------|
| Screening modality                                                                                                                                               | Cut-off value | Prevalence of frailty | Sensitivity  | Specificity  | PPV          | NPV          | LHR+              | LHR-             |
| Fried Frailty Index                                                                                                                                              | ≥3            | 48%                   | 59% (48-70%) | 85% (66-96%) | 92% (83-97%) | 41% (34-49%) | 4.00 (1.59-10.06) | 0.48 (0.35-0.65) |
| Groningen Frailty Indicator                                                                                                                                      | ≥4            | 67%                   | 74% (64-83%) | 52% (33-70%) | 82% (76-87%) | 40% (29-52%) | 1.53 (1.04-2.24)  | 0.51 (0.31-0.82) |
| G8                                                                                                                                                               | ≤ 14          | 88%                   | 92% (85-97%) | 26% (12-45%) | 79% (75-82%) | 53% (31-74%) | 1.25 (1.00-1.55)  | 0.29 (0.12-0.75) |
| ISAR-HP                                                                                                                                                          | ≥2            | 60%                   | 72% (61-81%) | 79% (59-92%) | 91% (83-96%) | 48% (38-58%) | 3.36 (1.64-6.92)  | 0.36 (0.24-0.58) |
| VMS-vulnerable elderly                                                                                                                                           | ≥2            | 82%                   | 90% (79-69%) | 38% (19-59%) | 78% (72-83%) | 60% (37-79%) | 1.44 (1.05-1.98)  | 0.27 (0.11-0.68) |
| Frailty Question (Q)                                                                                                                                             | ≥5            | 63%                   | 72% (61-82%) | 67% (45-84%) | 88% (80-93%) | 42% (32-53%) | 2.16 (1.21-3.87)  | 0.42 (0.27-0.66) |
| Frailty Question: clinical judgment of the nephrologist                                                                                                          |               |                       |              |              |              |              |                   |                  |
| Sens sensitivity, spec specificity, PPV positive predictive value, NPV negative predictive value, LHR+ positive likelihood ratio, LHR- negative likelihood ratio |               |                       |              |              |              |              |                   |                  |

#### Frailty Question compared to the other tests

| Table 2. Prevalence and discriminating test characteristics frailty measurements                 |               |                       |              |              |              |              |                  |                  |
|--------------------------------------------------------------------------------------------------|---------------|-----------------------|--------------|--------------|--------------|--------------|------------------|------------------|
| Screening modality                                                                               | Cut-off value | Prevalence of frailty | Sensitivity  | Specificity  | PPV          | NPV          | LHR+             | LHR-             |
| Fried Frailty Index                                                                              | ≥3            | 51%                   | 64% (50-76%) | 71% (53-85%) | 78% (67-86%) | 55% (44-64%) | 2.16 (1.24-3.78) | 0.52 (0.34-0.78) |
| GFI                                                                                              | ≥4            | 69%                   | 69% (57-80%) | 32% (18-49%) | 63% (57-69%) | 38% (25-52%) | 1.01 (0.77-1.35) | 0.97 (0.54-1.76) |
| G8                                                                                               | ≤ 14          | 87%                   | 91% (81-97%) | 18% (8-34%)  | 66% (62-69%) | 54% (30-76%) | 1.11 (0.94-1.32) | 0.50 (0.18-1.38) |
| ISAR-HP                                                                                          | ≥2            | 63%                   | 68% (55-80%) | 46% (29-63%) | 68% (60-75%) | 46% (33-59%) | 1.26 (0.89-1.79) | 0.69 (0.41-1.16) |
| VMS                                                                                              | ≥2            | 84%                   | 83% (68-93%) | 15% (4-35%)  | 61% (55-66%) | 36% (16-64%) | 0.98 (0.79-1.21) | 1.11 (0.36-3.42) |
| Frailty Question: clinical judgment of the nephrologist                                          |               |                       |              |              |              |              |                  |                  |
| Sens sensitivity, spec specificity, PPV positive predictive value, NPV negative predictive value |               |                       |              |              |              |              |                  |                  |

Supplemental material is neither peer-reviewed nor thoroughly edited by CJASN. The authors alone are responsible for the accuracy and presentation of the material.

**Appendix 4. Discriminating abilities (cont.)**

**Frailty Question and one of the other tests compared to the GA**

| Table 3. Prevalence and discriminating test characteristics frailty measurements |               |                       |              |              |              |              |                  |                  |
|----------------------------------------------------------------------------------|---------------|-----------------------|--------------|--------------|--------------|--------------|------------------|------------------|
| Screening modality                                                               | Cut-off value | Prevalence of frailty | Sensitivity  | Specificity  | PPV          | NPV          | LHR+             | LHR-             |
| Q & Fried Frailty Index                                                          | ≥5 or ≥3      | 67%                   | 78% (68-86%) | 64% (45-81%) | 87% (80-91%) | 50% (39-61%) | 2.20 (1.35-3.84) | 0.34 (0.21-0.54) |
| Q & GFI                                                                          | ≥5 or ≥4      | 84%                   | 91% (84-96%) | 39% (20-58%) | 82% (77-85%) | 60% (40-77%) | 1.49 (1.12-1.89) | 0.22 (0.10-0.50) |
| Q & G8                                                                           | ≥5 or ≤ 14    | 93%                   | 97% (91-99%) | 19% (7-37%)  | 75% (66-82%) | 78% (75-81%) | 1.20 (1.01-1.43) | 0.17 (0.04-0.63) |
| Q & ISAR-HP                                                                      | ≥5 or ≥2      | 75%                   | 87% (78-93%) | 58% (39-75%) | 86% (80-90%) | 60% (45-73%) | 2.07 (1.36-3.16) | 0.23 (0.12-0.42) |
| Q & VMS                                                                          | ≥5 or ≥2      | 83%                   | 87% (78-93%) | 28% (13-47%) | 79% (76-83%) | 40% (23-60%) | 1.20 (0.94-1.52) | 0.48 (0.22-1.07) |

*Frailty Question: clinical judgment of the nephrologist*  
*Sens sensitivity, spec specificity, PPV positive predictive value, NPV negative predictive value, LHR+ positive likelihood ratio, LHR- negative likelihood ratio*

| Table 4. Prevalence and discriminating test characteristics frailty measurements– GA minimum of 3 impairments |               |                       |                |              |              |              |                  |                  |
|---------------------------------------------------------------------------------------------------------------|---------------|-----------------------|----------------|--------------|--------------|--------------|------------------|------------------|
| Screening modality                                                                                            | Cut-off value | Prevalence of frailty | Sensitivity    | Specificity  | PPV          | NPV          | LHR+             | LHR-             |
| Fried Frailty Index                                                                                           | ≥3            | 48%                   | 71% (56-83%)   | 70% (57-81%) | 65% (55-74%) | 75% (65-83%) | 2.36 (1.54-3.62) | 0.42 (0.26-0.67) |
| Groningen Frailty Indicator                                                                                   | ≥4            | 67%                   | 87% (75-95%)   | 47% (36-60%) | 57% (50-63%) | 83% (69-91%) | 1.67 (1.30-2.14) | 0.27 (0.13-0.56) |
| G8                                                                                                            | ≤ 14          | 88%                   | 94% (85-99%)   | 17% (9-28%)  | 47% (44-50%) | 80% (54-93%) | 1.14 (1.01-1.30) | 0.32 (0.09-1.08) |
| ISAR-HP                                                                                                       | ≥2            | 60%                   | 86% (74-94%)   | 62% (49-74%) | 65% (56-72%) | 85% (73-92%) | 2.26 (1.62-3.16) | 0.22 (0.11-0.45) |
| VMS-vulnerable elderly                                                                                        | ≥2            | 82%                   | 100% (90-100%) | 32% (19-47%) | 53% (48-58%) | 100% (-)     | 1.47 (1.21-1.79) | -                |
| Frailty Question (Q)                                                                                          | ≥5            | 63%                   | 76% (61-87%)   | 47% (34-61%) | 54% (46-60%) | 71% (58-81%) | 1.45 (1.08-1.94) | 0.50 (0.28-0.90) |

*Frailty Question: clinical judgment of the nephrologist*  
*Sens sensitivity, spec specificity, PPV positive predictive value, NPV negative predictive value, , LHR+ positive likelihood ratio, LHR- negative likelihood ratio*
